# Supplementary material
Source: Research Square preprint supplement (doi:10.21203/rs.3.rs-9773832/v1)
Supplement: Supplementary file 2 [file b734b4e426377419728c8e92.pdf]

Participant ID \_\_\_\_\_

Date \_\_\_\_\_

Thank you for participating in our study “Evaluation of Acceptance of Synthetic Memory Technology in Rehabilitation for People with Memory Loss”. We want to know your thoughts about a new tool that creates images from your memories. This tool uses text prompts to create images that accurately reflect the described memories. These images, known as synthetic memories, are visual representations of past experiences.

To further facilitate your understanding, below is an example of an image created by the tool from a person’s description of a hut made of canes built by him, his brother, and his dog when he was a child. The image is synthetic memory, which is the person’s recollection of his childhood event of building a hut.

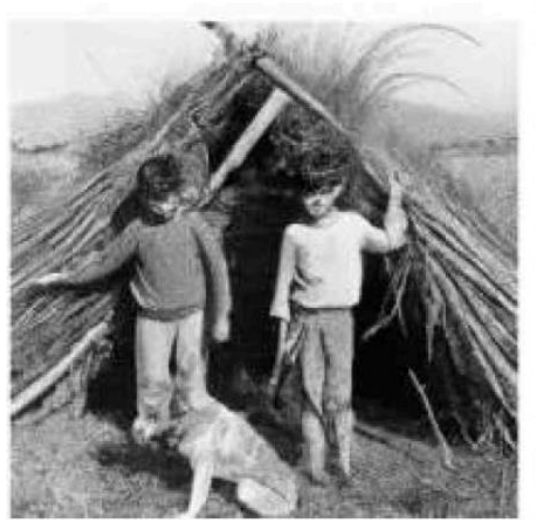

We believe synthetic memories can be a valuable tool in reminiscence therapy (RT). RT is the process of collecting and recalling memories to improve the psychological health of individuals with memory loss, including people with dementia and trauma survivors. RT has been shown to improve cognition, alleviate depression and enhance quality of life in older adults.

By recreating important yet often forgotten moments with no record of their existence, such as photos, we hope synthetic memories, as part of RT, can fill in that gap. Thereby possibly slowing cognitive decline and potentially boosting overall well-being and happiness.

Please click the link below for the explainer video of synthetic memories [https://drive.google.com/file/d/1GUz4gC4cYE\\_Mlao3EBW4sXuRarL5iN8L/view?usp=sharing](https://drive.google.com/file/d/1GUz4gC4cYE_Mlao3EBW4sXuRarL5iN8L/view?usp=sharing)

This survey is to help researchers understand the acceptance of using tools that generate images to create synthetic memories and its related ethical considerations. Therefore, your responses are important to us. Please attempt to answer every question. The survey will take about 30 – 45 minutes to complete, starting with demographics questions followed by questions on your familiarity with the tools that generate images, and your attitude and perception of using the tools to recreate a person’s memories. Thank you!

## Section A - Demographic information

In this section, we would like to know more about you. Please tell us about yourself by responding to the following questions.

### 1. Age

- 18-29
- 30-39
- 40-49
- 50-59

- 60-69
- 70-79
- 80-89
- 90 or older
- Prefer not to disclose

2. Gender

- Male
- Female
- Non-binary
- Prefer not to disclose

3. Highest level of education

- University degree
- Master's degree
- Doctorate
- Prefer not to disclose
- Other, please specify \_\_\_\_\_

4. Ethnicity

- Indigenous people
- Arab/West Asian
- Black
- East/Southeast Asian
- Latin American
- White
- Prefer not to disclose
- Other, please specify \_\_\_\_\_

5. Please specify your current professional role

- Art therapist
- Reminiscence therapist
- Occupational therapist
- Cognitive therapist
- Psychologist
- Counsellor
- Psychotherapist

- Prefer not to disclose
- Other, please specify \_\_\_\_\_

6. How long have you been working in your current role?

- Less than 1 year
- 1 – 3 years
- 4 – 6 years
- 7 – 10 years
- More than 10 years
- Prefer not to disclose

7. Type of workplace

- Private practice
- Hospital
- Educational institution (i.e., university)
- Community health center
- Long-term care facility
- Prefer not to disclose
- Other, please specify \_\_\_\_\_

8. What is the cause of the memory issues or loss in the individuals you work with?

- Alzheimer’s disease or related dementia
- Stroke
- Mental health conditions (e.g., depression, anxiety)
- Traumatic brain injury
- Substance abuse
- Prefer not to disclose
- Other, please specify \_\_\_\_\_

9. Do you have experience working with reminiscence therapy?

- Yes
- No

10. How confident are you using smart technology, such as a computer, tablet or smartphone?

|                      |   |   |   |   |
|----------------------|---|---|---|---|
| 1                    | 2 | 3 | 4 | 5 |
| Not confident at all |   |   |   |   |

|  |  |  |  |                |
|--|--|--|--|----------------|
|  |  |  |  | Very confident |
|--|--|--|--|----------------|

## Section B - Awareness and familiarity of the tool that creates images

There are several tools for creating images that are available on the market, including such as DALL.E, Stable Diffusion and MidJourney. In this section, we would like to understand your familiarity with these types of technologies.

1. On a scale of 1 to 5, how familiar are you with a tool that creates images?

|                          |   |   |   |                    |
|--------------------------|---|---|---|--------------------|
| 1<br>Not familiar at all | 2 | 3 | 4 | 5<br>Very familiar |
|--------------------------|---|---|---|--------------------|

2. Have you used any tools that create images?

- No  
 Yes, which tool(s) \_\_\_\_\_

2.1. If you answered "Yes" to question 2, do you think it is easy to access a tool that creates images?

- No  
 Yes

## Section C – Perception and attitude of the use of an image-generating tool

In this section, we would like to understand your level of acceptance using the tool that creates images to recreate your client's memories of past events in Reminiscence Therapy. As mentioned, the images created from the tool are synthetic memories of a person's recollection of their past events.

1. We would like to know your attitude toward using a tool that generates images to recreate a person's memories in **Reminiscence Therapy (RT)**. Please circle the answer that best describes your attitude towards the following statements regarding using the tool in **RT sessions** to help people with memory issues or memory loss.

|                                                                                                 | <b>Strongly Disagree (SD)</b> | <b>Disagree (D)</b> | <b>Neutral (N)</b> | <b>Agree (A)</b> | <b>Strongly Agree (SA)</b> |
|-------------------------------------------------------------------------------------------------|-------------------------------|---------------------|--------------------|------------------|----------------------------|
| a) I think the tool to recreate my client's memories in RT would be scary                       |                               |                     |                    |                  |                            |
| b) I think the tool to recreate my client's memories in RT would be intimidating                |                               |                     |                    |                  |                            |
| c) I think it would be a good idea to use the tool to recreate the memories of my clients in RT |                               |                     |                    |                  |                            |
| d) It would be good to make use of the tool to recreate my client's memories in RT              |                               |                     |                    |                  |                            |
| e) I would certainly use the tool to recreate my client's memories in RT                        |                               |                     |                    |                  |                            |
| f) I think the tool to recreate the memories of my clients in RT would be enjoyable             |                               |                     |                    |                  |                            |
| g) I think I would enjoy using the tool to recreate the memories of my clients in RT            |                               |                     |                    |                  |                            |
| h) I think the tool to recreate the memories                                                    |                               |                     |                    |                  |                            |

|                                                                                             |  |  |  |  |  |
|---------------------------------------------------------------------------------------------|--|--|--|--|--|
| of my clients in RT would be boring                                                         |  |  |  |  |  |
| i) I think the tool to recreate my client's memories in RT would be useful                  |  |  |  |  |  |
| j) I think I would feel uneasy to use the tool to recreate the memories of my clients in RT |  |  |  |  |  |
| k) I think I would know quickly how to use the tool to recreate my client's memories        |  |  |  |  |  |
| l) I think I could use the tool without any help                                            |  |  |  |  |  |
| m) I think I could use the tool when there is someone around to help me                     |  |  |  |  |  |
| n) I think I could use the tool when I have a good manual                                   |  |  |  |  |  |

2. The following questions ask for your opinion on the potential benefits of using a tool that generates images to recreate a person's memories in **Reminiscence Therapy**. Please circle the answer that best reflects your response to the following statements.

|                                                                        | <b>Strongly Disagree (SD)</b> | <b>Disagree (D)</b> | <b>Neutral (N)</b> | <b>Agree (A)</b> | <b>Strongly Agree (SA)</b> |
|------------------------------------------------------------------------|-------------------------------|---------------------|--------------------|------------------|----------------------------|
| a) I believe using the tool to recreate my client's memory in RT could |                               |                     |                    |                  |                            |

|                                                                                                                     |  |  |  |  |  |
|---------------------------------------------------------------------------------------------------------------------|--|--|--|--|--|
| improve their social interaction with their family and friends                                                      |  |  |  |  |  |
| b) I think the images created with the tool could bring up feelings and connect with personal stories and memories. |  |  |  |  |  |
| c) People with memory issues (i.e., people with dementia) could benefit from using the tool.                        |  |  |  |  |  |

3. Are there any other benefits that you can think of when using the tool?

---



---

4. Please indicate which benefit mentioned above is most important to you.

- I believe using the tool to recreate my client’s memory in RT could improve their social interaction with their family and friends.
- I think the images created with the tool could bring up feelings and connect with personal stories and memories.
- People with memory issues could benefit from using the tool.
- None of the above
- Other, please specify \_\_\_\_\_

5. The following questions ask for your opinion on the practical considerations of using the tool. Please circle the answer that best reflects your response to the following statements.

|  |                               |                     |                    |                  |                            |
|--|-------------------------------|---------------------|--------------------|------------------|----------------------------|
|  | <b>Strongly Disagree (SD)</b> | <b>Disagree (D)</b> | <b>Neutral (N)</b> | <b>Agree (A)</b> | <b>Strongly Agree (SA)</b> |
|--|-------------------------------|---------------------|--------------------|------------------|----------------------------|

|                                                                                                            |  |  |  |  |  |
|------------------------------------------------------------------------------------------------------------|--|--|--|--|--|
| a) The cost would be a significant factor in my decision to use the tool                                   |  |  |  |  |  |
| b) I think it would be safe to use the tool to create images based on the recall of people's memories      |  |  |  |  |  |
| c) Some images created by the tool may include people. Their faces should be blurred.                      |  |  |  |  |  |
| d) It would be important that the memories recreated by the tool accurately match a person's recollections |  |  |  |  |  |

6. Are there any other practical considerations that you can think of when using the tool?

---



---



---

7. Please indicate which item from the above is most important to you.

- The cost would be a significant factor in my decision to use the tool
- I think it would be safe to use the tool to create images based on the recall of people's memories
- Some images recreated by the tool may include people. Their faces should be blurred.
- It would be important that the memories recreated by the tool accurately match a person's recollections
- None of the above
- Other, please specify \_\_\_\_\_

8. The following questions ask for your opinion on the potential risks of using the tool. Please circle the answer that best reflects your response to the following statements.

|                                                                                                                                 | <b>Strongly Disagree (SD)</b> | <b>Disagree (D)</b> | <b>Neutral (N)</b> | <b>Agree (A)</b> | <b>Strongly Agree (SA)</b> |
|---------------------------------------------------------------------------------------------------------------------------------|-------------------------------|---------------------|--------------------|------------------|----------------------------|
| a) I would worry about the potential misuse of the memories recreated by the tool (i.e., creating false memories, manipulation) |                               |                     |                    |                  |                            |
| b) There would be a risk of memories recreated by the tool being mistaken for real memories                                     |                               |                     |                    |                  |                            |
| c) I would be concerned about where the data (i.e., recalled memories) would be stored and used.                                |                               |                     |                    |                  |                            |
| d) I would be concerned about the original memories of my clients being altered.                                                |                               |                     |                    |                  |                            |

9. Are there any other concerns that you can think of when using the tool?

---



---



---

10. Please indicate which item from the above is the greatest concern to you.

- I would worry about the potential misuse of the memories recreated by the tool (i.e., creating false memories, manipulation)

- There would be a risk of memories recreated by the tool being mistaken for real memories
- I would be concerned about where the data (i.e., recalled memories) would be stored and used.
- I would be concerned about the original memories of my clients being altered.
- None of the above
- Other, please specify \_\_\_\_\_

11. Which of the following features would make the tool more acceptable to you?

You may choose more than one option.

- Multi-Language support
- Enhanced privacy controls
- Voice input
- Interactive tutorials
- Clear, simple consent language
- Other, please specify \_\_\_\_\_

12. Do you have any other thoughts you would like to share about synthetic memories?

---

---

---

---

Thank you very much for your time to take our survey!
